# Supplementary material for: Selective detection of tartaric acid using amino acid interlinked silver nanoparticles as a colorimetric probe
Source: Royal Society of Chemistry journal article supplement (doi:10.1039/d2ay01088g), 2022-01-01
Supplement: d2ay01088g1.pdf [file d2ay01088g1.pdf]

**Supporting Information**

|                                                                                                             |                                                                                                             |
|-------------------------------------------------------------------------------------------------------------|-------------------------------------------------------------------------------------------------------------|
| 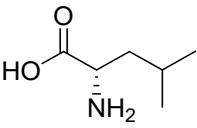 <p><b>Leucine</b></p>     |  <p><b>Methionine</b></p> |
|  <p><b>Glycine</b></p>     |  <p><b>Tyrosine</b></p>   |
|  <p><b>Valine</b></p>     |  <p><b>Cysteine</b></p> |
|  <p><b>Glutamine</b></p> |                                                                                                             |
| <p><b>Scheme S1:</b> Chemical structures of some amino acids.</p>                                           |                                                                                                             |

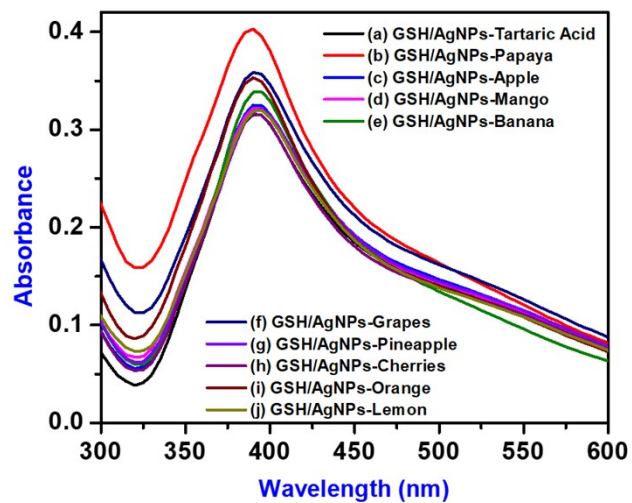

**Fig. S1.** UV-Vis spectra of GSH/AgNPs with different fruit samples.
